# Supplementary material for: Biomechanical and tomographic differences in the microarchitecture and strength of trabecular and cortical bone in the early stage of male osteoporosis
Source: PubMed Central journal article supplement (PMC6687113; doi:10.1371/journal.pone.0219718), 2019-08-08
Supplement: pone.0219718.s001.pdf [file pone.0219718.s001.pdf]

Table 1

|   | Cortical bone thickness |       | Cortical bone area |       | Total bone section area |     | Total bone section area |       |   |       |       |
|---|-------------------------|-------|--------------------|-------|-------------------------|-----|-------------------------|-------|---|-------|-------|
|   | Sham                    | ORX   | Sham               | ORX   | Sham                    | ORX | Sham                    | ORX   |   |       |       |
| 1 | 0.33                    | 0.302 | 1                  | 7.154 | 7.227                   | 1   | 7.757                   | 8.052 | 1 | 85.92 | 86.4  |
| 2 | 0.295                   | 0.33  | 2                  | 7.17  | 6.744                   | 2   | 8.543                   | 7.754 | 2 | 85.82 | 86.38 |
| 3 | 0.314                   | 0.344 | 3                  | 7.122 | 6.88                    | 3   | 8.53                    | 8.217 | 3 | 85.91 | 86.23 |
| 4 | 0.313                   | 0.325 | 4                  | 7.039 | 6.753                   | 4   | 8.2                     | 7.852 | 4 | 85.9  | 86.39 |
| 5 | 0.329                   | 0.341 | 5                  | 6.852 | 7.15                    | 5   | 8.21                    | 8.05  | 5 | 85.88 | 86.4  |
| 6 | 0.305                   | 0.306 | 6                  | 6.77  | 7.175                   | 6   | 7.897                   | 8.252 | 6 | 85.98 | 86.4  |
| 7 | 0.325                   | 0.35  | 7                  | 7.211 | 6.94                    | 7   | 8.64                    | 7.887 | 7 | 85.88 | 86.45 |
| 8 | 0.295                   | 0.308 | 8                  | 6.86  | 6.71                    | 8   | 7.86                    | 8.35  | 8 | 85.9  | 86.36 |
