# Supplementary material for: Biomechanical and tomographic differences in the microarchitecture and strength of trabecular and cortical bone in the early stage of male osteoporosis
Source: PubMed Central journal article supplement (PMC6687113; doi:10.1371/journal.pone.0219718), 2019-08-08
Supplement: pone.0219718.s002.pdf [file pone.0219718.s002.pdf]

Table 2

|   | Maximum loading force |     | Displacement at maximum load |      | Bone stiffness |     | Energy at maximum load |     | Ultimate stress |     |     |   |    |    |
|---|-----------------------|-----|------------------------------|------|----------------|-----|------------------------|-----|-----------------|-----|-----|---|----|----|
|   | Sham                  | ORX | Sham                         | ORX  | Sham           | ORX | Sham                   | ORX | Sham            | ORX |     |   |    |    |
| 1 | 190                   | 178 | 1                            | 0.54 | 0.86           | 1   | 315                    | 97  | 1               | 105 | 91  | 1 | 65 | 86 |
| 2 | 162                   | 163 | 2                            | 1.2  | 0.56           | 2   | 321                    | 115 | 2               | 55  | 119 | 2 | 84 | 94 |
| 3 | 177                   | 162 | 3                            | 0.85 | 1.16           | 3   | 248                    | 59  | 3               | 98  | 65  | 3 | 83 | 78 |
| 4 | 164                   | 178 | 4                            | 0.86 | 1.21           | 4   | 179                    | 66  | 4               | 64  | 121 | 4 | 74 | 84 |
| 5 | 192                   | 192 | 5                            | 0.52 | 0.51           | 5   | 250                    | 85  | 5               | 57  | 59  | 5 | 64 | 99 |
| 6 | 177                   | 186 | 6                            | 1.15 | 0.86           | 6   | 172                    | 121 | 6               | 96  | 90  | 6 | 75 | 77 |
