# Supplementary material for: Biomechanical and tomographic differences in the microarchitecture and strength of trabecular and cortical bone in the early stage of male osteoporosis
Source: PubMed Central journal article supplement (PMC6687113; doi:10.1371/journal.pone.0219718), 2019-08-08
Supplement: pone.0219718.s003.pdf [file pone.0219718.s003.pdf]

Fig. 2

|   | Testosterone |      |
|---|--------------|------|
|   | Sham         | ORX  |
| 1 | 4722         | 2035 |
| 2 | 4004         | 2381 |
| 3 | 5450         | 1713 |
| 4 | 4002         | 1637 |
| 5 | 5452         | 2407 |
| 6 | 4700         | 2051 |
