# Supplementary material for: Biomechanical and tomographic differences in the microarchitecture and strength of trabecular and cortical bone in the early stage of male osteoporosis
Source: PubMed Central journal article supplement (PMC6687113; doi:10.1371/journal.pone.0219718), 2019-08-08
Supplement: pone.0219718.s004.pdf [file pone.0219718.s004.pdf]

Fig. 3B

|   | Trabecular bone number |      |
|---|------------------------|------|
|   | Sham                   | ORX  |
| 1 | 2.51                   | 1.8  |
| 2 | 2.7                    | 1.64 |
| 3 | 2.65                   | 2.04 |
| 4 | 2.75                   | 1.72 |
| 5 | 2.16                   | 1.96 |
| 6 | 2.26                   | 1.84 |

Fig. 3C

|   | Trabecular separation |       |
|---|-----------------------|-------|
|   | Sham                  | ORX   |
| 1 | 0.303                 | 0.279 |
| 2 | 0.351                 | 0.269 |
| 3 | 0.327                 | 0.259 |
| 4 | 0.357                 | 0.268 |
| 5 | 0.297                 | 0.277 |
| 6 | 0.325                 | 0.261 |

Fig. 3D

|   | Trabecular pattern factor |     |
|---|---------------------------|-----|
|   | Sham                      | ORX |
| 1 | 35                        | 71  |
| 2 | 31                        | 81  |
| 3 | 37                        | 61  |
| 4 | 43                        | 78  |
| 5 | 28                        | 64  |
| 6 | 46                        | 70  |

Fig. 3E

|   | Trabecular thickness |     |
|---|----------------------|-----|
|   | Sham                 | ORX |
| 1 | 141                  | 110 |
| 2 | 90                   | 115 |
| 3 | 116                  | 103 |
| 4 | 95                   | 104 |
| 5 | 137                  | 114 |
| 6 | 115                  | 113 |
