# Supplementary material for: Biomechanical and tomographic differences in the microarchitecture and strength of trabecular and cortical bone in the early stage of male osteoporosis
Source: PubMed Central journal article supplement (PMC6687113; doi:10.1371/journal.pone.0219718), 2019-08-08
Supplement: pone.0219718.s005.pdf [file pone.0219718.s005.pdf]

Fig. 4B

Maximum loading force

|   | Sham | ORX |
|---|------|-----|
| 1 | 108  | 61  |
| 2 | 101  | 68  |
| 3 | 115  | 54  |
| 4 | 116  | 53  |
| 5 | 102  | 60  |
| 6 | 105  | 69  |

Fig. 4C

Displacement at maximum load

|   | Sham | ORX  |
|---|------|------|
| 1 | 3.83 | 2.55 |
| 2 | 3.5  | 2.95 |
| 3 | 4    | 2.75 |
| 4 | 4.05 | 3.05 |
| 5 | 3.4  | 2.55 |
| 6 | 3.7  | 2.65 |

Fig. 4D

Energy at maximum load

|   | Sham | ORX |
|---|------|-----|
| 1 | 31   | 12  |
| 2 | 27   | 17  |
| 3 | 29   | 14  |
| 4 | 31   | 16  |
| 5 | 27   | 13  |
| 6 | 29   | 14  |

Fig. 4E

Ultimate stress

|   | Sham | ORX |
|---|------|-----|
| 1 | 15.1 | 7.9 |
| 2 | 16   | 8.8 |
| 3 | 14.7 | 9.8 |
| 4 | 15.8 | 9.7 |
| 5 | 14.1 | 7.8 |
| 6 | 15   | 9   |
